# Supplementary material for: Cytotoxic and Antibacterial Cembranoids from a South China Sea Soft Coral, Lobophytum sp
Source: MDPI journal article supplement (doi:10.3390/md11041162), 2013-04-03
Supplement: s2 [file s2]

marinedrugs-11-01162-s001.mol
  corina  04151405043D 1   1.00000     0.00000 
CORINA 3.49 0023  12.04.2013
 23 25  0  0  0  0  0  0  0  0999 V2000
   -0.0187    1.5256    0.0104 C   0  0  0  0  0  0  0  0  0  0  0  0
    0.0021   -0.0041    0.0020 C   0  0  0  0  0  0  0  0  0  0  0  0
   -0.1892   -0.4392   -2.7763 C   0  0  0  0  0  0  0  0  0  0  0  0
   -1.5135   -0.4269   -2.0237 C   0  0  0  0  0  0  0  0  0  0  0  0
   -1.3362   -0.5239   -0.5017 C   0  0  0  0  0  0  0  0  0  0  0  0
    1.2849    2.3190    0.0022 C   0  0  0  0  0  0  0  0  0  0  0  0
    1.2545    3.7122   -0.6260 C   0  0  0  0  0  0  0  0  0  0  0  0
    2.5153    4.0643   -1.3962 C   0  0  0  0  0  0  0  0  0  0  0  0
   -0.2577    0.4791   -3.9748 C   0  0  0  0  0  0  0  0  0  0  0  0
    0.6554    1.4099   -4.0959 C   0  0  0  0  0  0  0  0  0  0  0  0
    0.6643    2.3769   -5.2477 C   0  0  0  0  0  0  0  0  0  0  0  0
    1.8722    3.3092   -5.1175 C   0  0  0  0  0  0  0  0  0  0  0  0
    1.8450    3.9908   -3.7690 C   0  0  0  0  0  0  0  0  0  0  0  0
    2.4973    3.4574   -2.7697 C   0  0  0  0  0  0  0  0  0  0  0  0
    1.0728    5.2752   -3.6161 C   0  0  0  0  0  0  0  0  0  0  0  0
    2.6055    1.5529   -0.0342 C   0  0  0  0  0  0  0  0  0  0  0  0
    0.4841    2.1673    1.1898 O   0  0  0  0  0  0  0  0  0  0  0  0
   -1.3432    0.3121   -5.0025 C   0  0  0  0  0  0  0  0  0  0  0  0
   -1.5151   -2.0033   -0.2207 C   0  0  0  0  0  0  0  0  0  0  0  0
   -2.2709   -1.6242   -2.3847 O   0  0  0  0  0  0  0  0  0  0  0  0
   -2.1759   -2.5481   -1.4180 C   0  0  0  0  0  0  0  0  0  0  0  0
   -1.1624   -2.6715    0.8708 C   0  0  0  0  0  0  0  0  0  0  0  0
   -2.5815   -3.6883   -1.5140 O   0  0  0  0  0  0  0  0  0  0  0  0
  1  2  1  0      
  3  4  1  0      
  4  5  1  0      
  5  2  1  0      
  6  7  1  0      
  7  8  1  0      
  3  9  1  0      
  6  1  1  0      
  9 10  2  0      
 10 11  1  0      
 11 12  1  0      
 12 13  1  0      
 13 14  2  0      
  8 14  1  0      
 13 15  1  0      
  6 16  1  0      
  6 17  1  0      
  1 17  1  0      
  9 18  1  0      
  5 19  1  0      
  4 20  1  0      
 19 21  1  0      
 20 21  1  0      
 19 22  2  0      
 21 23  2  0      
M  END
$$$$
