# Supplementary material for: Cytotoxic and Antibacterial Cembranoids from a South China Sea Soft Coral, Lobophytum sp
Source: MDPI journal article supplement (doi:10.3390/md11041162), 2013-04-03
Supplement: s3 [file s3]

marinedrugs-11-01162-s001.mol
  ChemDraw03101420562D

 23 25  0  0  0  0  0  0  0  0999 V2000
   -0.0627    0.6290    0.0000 C   0  0  0  0  0  0  0  0  0  0  0  0
    0.7623    0.6290    0.0000 C   0  0  0  0  0  0  0  0  0  0  0  0
   -0.0627   -0.7999    0.0000 C   0  0  0  0  0  0  0  0  0  0  0  0
    0.7623   -0.7999    0.0000 C   0  0  0  0  0  0  0  0  0  0  0  0
    1.1748   -0.0854    0.0000 C   0  0  0  0  0  0  0  0  0  0  0  0
   -0.6460    1.2124    0.0000 C   0  0  0  0  0  0  0  0  0  0  0  0
   -1.3605    0.7999    0.0000 C   0  0  0  0  0  0  0  0  0  0  0  0
   -2.1458    1.2272    0.0000 C   0  0  0  0  0  0  0  0  0  0  0  0
   -0.7771   -1.2124    0.0000 C   0  0  0  0  0  0  0  0  0  0  0  0
   -1.4916   -0.7999    0.0000 C   0  0  0  0  0  0  0  0  0  0  0  0
   -2.2061   -1.2124    0.0000 C   0  0  0  0  0  0  0  0  0  0  0  0
   -2.9206   -0.7999    0.0000 C   0  0  0  0  0  0  0  0  0  0  0  0
   -2.5081   -0.0854    0.0000 C   0  0  0  0  0  0  0  0  0  0  0  0
   -2.9206    0.6290    0.0000 C   0  0  0  0  0  0  0  0  0  0  0  0
   -1.6831   -0.0854    0.0000 C   0  0  0  0  0  0  0  0  0  0  0  0
   -0.6460    2.0374    0.0000 C   0  0  0  0  0  0  0  0  0  0  0  0
    0.1509    1.4259    0.0000 O   0  0  0  0  0  0  0  0  0  0  0  0
   -0.7771   -2.0374    0.0000 C   0  0  0  0  0  0  0  0  0  0  0  0
    1.9998   -0.0854    0.0000 C   0  0  0  0  0  0  0  0  0  0  0  0
    1.3457   -1.3833    0.0000 O   0  0  0  0  0  0  0  0  0  0  0  0
    2.2061   -0.9591    0.0000 C   0  0  0  0  0  0  0  0  0  0  0  0
    2.5832    0.4979    0.0000 C   0  0  0  0  0  0  0  0  0  0  0  0
    2.9206   -1.3716    0.0000 O   0  0  0  0  0  0  0  0  0  0  0  0
  1  2  1  0      
  3  4  1  0      
  4  5  1  0      
  5  2  1  0      
  6  7  1  0      
  7  8  1  0      
  3  9  1  0      
  6  1  1  0      
  9 10  2  0      
 10 11  1  0      
 11 12  1  0      
 12 13  1  0      
 13 14  2  0      
  8 14  1  0      
 13 15  1  0      
  6 16  1  6      
  6 17  1  1      
  1 17  1  1      
  9 18  1  0      
  5 19  1  6      
  4 20  1  6      
 19 21  1  0      
 20 21  1  0      
 19 22  2  0      
 21 23  2  0      
M  END
