# Supplementary material for: Cytotoxic and Antibacterial Cembranoids from a South China Sea Soft Coral, Lobophytum sp
Source: MDPI journal article supplement (doi:10.3390/md11041162), 2013-04-03
Supplement: s4 [file s4]

marinedrugs-11-01162-s002.mol
  corina  04151405043D 1   1.00000     0.00000 
CORINA 3.49 0023  12.04.2013
 25 26  0  0  0  0  0  0  0  0999 V2000
    0.7133    2.2308   -0.8557 C   0  0  0  0  0  0  0  0  0  0  0  0
    0.7966    0.7461   -1.0916 C   0  0  0  0  0  0  0  0  0  0  0  0
   -0.9047    0.3890    2.1096 C   0  0  0  0  0  0  0  0  0  0  0  0
   -1.0388    0.8957    0.6688 C   0  0  0  0  0  0  0  0  0  0  0  0
   -0.2433   -0.0127   -0.2793 C   0  0  0  0  0  0  0  0  0  0  0  0
    1.8030    2.9087   -0.5827 C   0  0  0  0  0  0  0  0  0  0  0  0
    1.7283    4.3902   -0.3228 C   0  0  0  0  0  0  0  0  0  0  0  0
    3.0687    4.8718    0.2434 C   0  0  0  0  0  0  0  0  0  0  0  0
    0.2270    1.1138    2.7973 C   0  0  0  0  0  0  0  0  0  0  0  0
    0.0108    2.2648    3.3857 C   0  0  0  0  0  0  0  0  0  0  0  0
    1.1509    2.9809    4.0589 C   0  0  0  0  0  0  0  0  0  0  0  0
    1.3382    4.3675    3.4363 C   0  0  0  0  0  0  0  0  0  0  0  0
    2.6163    4.3832    2.6348 C   0  0  0  0  0  0  0  0  0  0  0  0
    2.8590    5.4786    1.6309 C   0  0  0  0  0  0  0  0  0  0  0  0
    3.5132    3.4450    2.8118 C   0  0  0  0  0  0  0  0  0  0  0  0
    1.6123    0.5216    2.8048 C   0  0  0  0  0  0  0  0  0  0  0  0
   -1.2988   -0.6045   -1.1918 C   0  0  0  0  0  0  0  0  0  0  0  0
   -2.4299    0.8072    0.2562 O   0  0  0  0  0  0  0  0  0  0  0  0
   -2.5853   -0.0333   -0.7737 C   0  0  0  0  0  0  0  0  0  0  0  0
   -1.0985   -1.4728   -2.1802 C   0  0  0  0  0  0  0  0  0  0  0  0
   -3.6525   -0.2900   -1.2954 O   0  0  0  0  0  0  0  0  0  0  0  0
    3.1344    2.2032   -0.5446 C   0  0  0  0  0  0  0  0  0  0  0  0
    3.3419    1.8737    0.4735 H   0  0  0  0  0  0  0  0  0  0  0  0
    4.0225    6.2182    2.0067 O   0  0  0  0  0  0  0  0  0  0  0  0
    3.7456    7.3604    2.8880 O   0  0  0  0  0  0  0  0  0  0  0  0
  1  2  1  0      
  3  4  1  0      
  4  5  1  0      
  5  2  1  0      
  6  7  1  0      
  7  8  1  0      
  3  9  1  0      
  6  1  2  0      
  9 10  2  0      
 10 11  1  0      
 11 12  1  0      
 12 13  1  0      
 13 14  1  0      
  8 14  1  0      
 13 15  2  0      
  9 16  1  0      
  5 17  1  0      
 17 19  1  0      
 18 19  1  0      
 17 20  2  0      
 19 21  2  0      
  6 22  1  0      
 22 23  1  0      
  4 18  1  0      
 14 24  1  0      
 24 25  1  0      
M  STY  1   1 SUP
M  SLB  1   1   1
M  SAL   1  2  24  25
M  SBL   1  1  25
M  SMT   1 OOH
M  SBV   1 25   -6.5333    5.0474
M  END
$$$$
