# Supplementary material for: Cytotoxic and Antibacterial Cembranoids from a South China Sea Soft Coral, Lobophytum sp
Source: MDPI journal article supplement (doi:10.3390/md11041162), 2013-04-03
Supplement: s5 [file s5]

marinedrugs-11-01162-s002.mol
  ChemDraw03101420562D

 25 26  0  0  0  0  0  0  0  0999 V2000
    0.5357    0.4228    0.0000 C   0  0  0  0  0  0  0  0  0  0  0  0
    1.3607    0.4228    0.0000 C   0  0  0  0  0  0  0  0  0  0  0  0
    0.5357   -1.0062    0.0000 C   0  0  0  0  0  0  0  0  0  0  0  0
    1.3607   -1.0062    0.0000 C   0  0  0  0  0  0  0  0  0  0  0  0
    1.7732   -0.2917    0.0000 C   0  0  0  0  0  0  0  0  0  0  0  0
   -0.0006    0.9590    0.0000 C   0  0  0  0  0  0  0  0  0  0  0  0
   -0.7622    0.5937    0.0000 C   0  0  0  0  0  0  0  0  0  0  0  0
   -1.5475    1.0209    0.0000 C   0  0  0  0  0  0  0  0  0  0  0  0
   -0.1788   -1.4187    0.0000 C   0  0  0  0  0  0  0  0  0  0  0  0
   -0.8933   -1.0062    0.0000 C   0  0  0  0  0  0  0  0  0  0  0  0
   -1.6077   -1.4187    0.0000 C   0  0  0  0  0  0  0  0  0  0  0  0
   -2.3222   -1.0062    0.0000 C   0  0  0  0  0  0  0  0  0  0  0  0
   -1.9097   -0.2917    0.0000 C   0  0  0  0  0  0  0  0  0  0  0  0
   -2.3222    0.4228    0.0000 C   0  0  0  0  0  0  0  0  0  0  0  0
   -1.0847   -0.2917    0.0000 C   0  0  0  0  0  0  0  0  0  0  0  0
   -0.1788   -2.2437    0.0000 C   0  0  0  0  0  0  0  0  0  0  0  0
    2.5982   -0.2917    0.0000 C   0  0  0  0  0  0  0  0  0  0  0  0
    1.9440   -1.5895    0.0000 O   0  0  0  0  0  0  0  0  0  0  0  0
    2.8044   -1.1653    0.0000 C   0  0  0  0  0  0  0  0  0  0  0  0
    3.1815    0.2917    0.0000 C   0  0  0  0  0  0  0  0  0  0  0  0
    3.5189   -1.5778    0.0000 O   0  0  0  0  0  0  0  0  0  0  0  0
   -0.0006    1.7634    0.0000 C   0  0  0  0  0  0  0  0  0  0  0  0
    0.6668    2.2437    0.0000 H   0  0  0  0  0  0  0  0  0  0  0  0
   -2.9355    0.5305    0.0000 O   0  0  0  0  0  0  0  0  0  0  0  0
   -3.5189    1.1139    0.0000 O   0  0  0  0  0  0  0  0  0  0  0  0
  1  2  1  0      
  3  4  1  0      
  4  5  1  0      
  5  2  1  0      
  6  7  1  0      
  7  8  1  0      
  3  9  1  0      
  6  1  2  0      
  9 10  2  0      
 10 11  1  0      
 11 12  1  0      
 12 13  1  0      
 13 14  1  0      
  8 14  1  0      
 13 15  2  0      
  9 16  1  0      
  5 17  1  6      
 17 19  1  0      
 18 19  1  0      
 17 20  2  0      
 19 21  2  0      
  6 22  1  0      
 22 23  1  0      
  4 18  1  1      
 14 24  1  1      
 24 25  1  0      
M  STY  1   1 SUP
M  SLB  1   1   1
M  SAL   1  2  24  25
M  SBL   1  1  25
M  SMT   1 OOH
M  SBV   1 25   -6.5333    5.0474
M  END
