# Supplementary material for: Cytotoxic and Antibacterial Cembranoids from a South China Sea Soft Coral, Lobophytum sp
Source: MDPI journal article supplement (doi:10.3390/md11041162), 2013-04-03
Supplement: s6 [file s6]

marinedrugs-11-01162-s003.mol
  corina  04151405043D 1   1.00000     0.00000 
CORINA 3.49 0023  12.04.2013
 24 25  0  0  0  0  0  0  0  0999 V2000
   -0.0183    1.4992    0.0103 C   0  0  0  0  0  0  0  0  0  0  0  0
    0.0021   -0.0041    0.0020 C   0  0  0  0  0  0  0  0  0  0  0  0
   -1.7582   -0.1853    3.1564 C   0  0  0  0  0  0  0  0  0  0  0  0
   -1.7964    0.4141    1.7473 C   0  0  0  0  0  0  0  0  0  0  0  0
   -1.2039   -0.5789    0.7365 C   0  0  0  0  0  0  0  0  0  0  0  0
    1.1145    2.1610    0.0030 C   0  0  0  0  0  0  0  0  0  0  0  0
    1.1128    3.6669    0.0335 C   0  0  0  0  0  0  0  0  0  0  0  0
    2.0081    4.1548    1.1750 C   0  0  0  0  0  0  0  0  0  0  0  0
   -0.4935    0.2462    3.8540 C   0  0  0  0  0  0  0  0  0  0  0  0
   -0.4210    1.4286    4.4135 C   0  0  0  0  0  0  0  0  0  0  0  0
    0.8467    1.8568    5.1074 C   0  0  0  0  0  0  0  0  0  0  0  0
    1.1097    3.3366    4.8191 C   0  0  0  0  0  0  0  0  0  0  0  0
    1.8525    3.4684    3.5142 C   0  0  0  0  0  0  0  0  0  0  0  0
    1.2700    4.0266    2.4825 C   0  0  0  0  0  0  0  0  0  0  0  0
    3.2662    2.9580    3.4006 C   0  0  0  0  0  0  0  0  0  0  0  0
    0.6900   -0.6854    3.9106 C   0  0  0  0  0  0  0  0  0  0  0  0
   -2.3406   -0.8449   -0.2297 C   0  0  0  0  0  0  0  0  0  0  0  0
   -3.1734    0.6385    1.3467 O   0  0  0  0  0  0  0  0  0  0  0  0
   -3.4823   -0.0538    0.2441 C   0  0  0  0  0  0  0  0  0  0  0  0
   -2.3095   -1.6386   -1.2975 C   0  0  0  0  0  0  0  0  0  0  0  0
   -4.5705   -0.0302   -0.2967 O   0  0  0  0  0  0  0  0  0  0  0  0
    2.4193    1.4080   -0.0444 C   0  0  0  0  0  0  0  0  0  0  0  0
    2.7592    1.2058    0.9713 H   0  0  0  0  0  0  0  0  0  0  0  0
   -2.6221    0.1628    3.7226 H   0  0  0  0  0  0  0  0  0  0  0  0
  1  2  1  0      
  3  4  1  0      
  4  5  1  0      
  5  2  1  0      
  6  7  1  0      
  7  8  1  0      
  3  9  1  0      
  6  1  2  0      
  9 10  2  0      
 10 11  1  0      
 11 12  1  0      
 12 13  1  0      
 13 14  2  0      
  8 14  1  0      
 13 15  1  0      
  9 16  1  0      
  5 17  1  0      
 17 19  1  0      
 18 19  1  0      
 17 20  2  0      
 19 21  2  0      
  6 22  1  0      
 22 23  1  0      
  4 18  1  0      
  3 24  1  4      
M  END
$$$$
