# Supplementary material for: Cytotoxic and Antibacterial Cembranoids from a South China Sea Soft Coral, Lobophytum sp
Source: MDPI journal article supplement (doi:10.3390/md11041162), 2013-04-03
Supplement: s8 [file s8]

marinedrugs-11-01162-s004.mol
  corina  04151405053D 1   1.00000     0.00000 
CORINA 3.49 0023  12.04.2013
 25 27  0  0  0  0  0  0  0  0999 V2000
   -0.0187    1.5259    0.0104 C   0  0  0  0  0  0  0  0  0  0  0  0
    0.0021   -0.0041    0.0020 C   0  0  0  0  0  0  0  0  0  0  0  0
   -2.2050   -1.0055   -2.8326 C   0  0  0  0  0  0  0  0  0  0  0  0
   -1.1222   -1.3412   -1.8108 C   0  0  0  0  0  0  0  0  0  0  0  0
   -1.3374   -0.5327   -0.5169 C   0  0  0  0  0  0  0  0  0  0  0  0
    1.3245    2.2563    0.0015 C   0  0  0  0  0  0  0  0  0  0  0  0
    1.4044    3.5786   -0.7605 C   0  0  0  0  0  0  0  0  0  0  0  0
    2.4516    3.4822   -1.8684 C   0  0  0  0  0  0  0  0  0  0  0  0
   -1.9400    0.3247   -3.4806 C   0  0  0  0  0  0  0  0  0  0  0  0
   -0.9040    0.4942   -4.2650 C   0  0  0  0  0  0  0  0  0  0  0  0
   -0.6759    1.8371   -4.9108 C   0  0  0  0  0  0  0  0  0  0  0  0
    0.8248    2.0887   -5.0585 C   0  0  0  0  0  0  0  0  0  0  0  0
    1.2851    3.0306   -3.9742 C   0  0  0  0  0  0  0  0  0  0  0  0
    1.9770    2.5674   -2.9642 C   0  0  0  0  0  0  0  0  0  0  0  0
    0.9537    4.4973   -4.0636 C   0  0  0  0  0  0  0  0  0  0  0  0
   -2.8784    1.4807   -3.2364 C   0  0  0  0  0  0  0  0  0  0  0  0
   -1.9054   -1.5522    0.4546 C   0  0  0  0  0  0  0  0  0  0  0  0
   -1.2301   -2.7424   -1.4286 O   0  0  0  0  0  0  0  0  0  0  0  0
   -1.7250   -2.8615   -0.1880 C   0  0  0  0  0  0  0  0  0  0  0  0
   -2.4532   -1.3101    1.6430 C   0  0  0  0  0  0  0  0  0  0  0  0
   -1.9912   -3.9229    0.3407 O   0  0  0  0  0  0  0  0  0  0  0  0
    2.6030    1.4166    0.0269 C   0  0  0  0  0  0  0  0  0  0  0  0
    3.4703    2.0761    0.0554 H   0  0  0  0  0  0  0  0  0  0  0  0
   -2.2257   -1.7796   -3.5997 H   0  0  0  0  0  0  0  0  0  0  0  0
    0.4853    2.2029    1.1594 O   0  0  0  0  0  0  0  0  0  0  0  0
  1  2  1  0      
  3  4  1  0      
  4  5  1  0      
  5  2  1  0      
  6  7  1  0      
  7  8  1  0      
  3  9  1  0      
  6  1  1  0      
  9 10  2  0      
 10 11  1  0      
 11 12  1  0      
 12 13  1  0      
 13 14  2  0      
  8 14  1  0      
 13 15  1  0      
  9 16  1  0      
  5 17  1  0      
 17 19  1  0      
 18 19  1  0      
 17 20  2  0      
 19 21  2  0      
 22 23  1  0      
  4 18  1  0      
  6 25  1  0      
  1 25  1  0      
  3 24  1  0      
  6 22  1  0      
M  END
$$$$
