# Supplementary material for: Cytotoxic and Antibacterial Cembranoids from a South China Sea Soft Coral, Lobophytum sp
Source: MDPI journal article supplement (doi:10.3390/md11041162), 2013-04-03
Supplement: s10 [file s10]

marinedrugs-11-01162-s005.mol
  corina  04151405053D 1   1.00000     0.00000 
CORINA 3.49 0023  12.04.2013
 25 26  0  0  0  0  0  0  0  0999 V2000
   -0.0021    1.5155    0.2427 C   0  0  0  0  0  0  0  0  0  0  0  0
    0.0390    0.0329    0.4944 C   0  0  0  0  0  0  0  0  0  0  0  0
   -1.3433    0.3456    3.8023 C   0  0  0  0  0  0  0  0  0  0  0  0
   -1.5567    0.7447    2.3386 C   0  0  0  0  0  0  0  0  0  0  0  0
   -1.1035   -0.3939    1.4101 C   0  0  0  0  0  0  0  0  0  0  0  0
    1.1309    2.1731    0.0029 C   0  0  0  0  0  0  0  0  0  0  0  0
    1.1066    3.6609   -0.2286 C   0  0  0  0  0  0  0  0  0  0  0  0
    2.0871    4.3439    0.7280 C   0  0  0  0  0  0  0  0  0  0  0  0
   -0.0312    0.9103    4.2850 C   0  0  0  0  0  0  0  0  0  0  0  0
    0.0609    2.1775    4.6064 C   0  0  0  0  0  0  0  0  0  0  0  0
    1.3791    2.7347    5.0825 C   0  0  0  0  0  0  0  0  0  0  0  0
    1.5634    4.1483    4.5282 C   0  0  0  0  0  0  0  0  0  0  0  0
    2.1809    4.0745    3.1544 C   0  0  0  0  0  0  0  0  0  0  0  0
    1.4798    4.4203    2.1040 C   0  0  0  0  0  0  0  0  0  0  0  0
    3.6025    3.6007    2.9989 C   0  0  0  0  0  0  0  0  0  0  0  0
    1.1771    0.0157    4.3945 C   0  0  0  0  0  0  0  0  0  0  0  0
   -2.3440   -0.7288    0.6063 C   0  0  0  0  0  0  0  0  0  0  0  0
   -2.9740    0.9402    2.0856 O   0  0  0  0  0  0  0  0  0  0  0  0
   -3.4178    0.1337    1.1137 C   0  0  0  0  0  0  0  0  0  0  0  0
   -2.4407   -1.6288   -0.3693 C   0  0  0  0  0  0  0  0  0  0  0  0
   -4.5619    0.1181    0.7040 O   0  0  0  0  0  0  0  0  0  0  0  0
    2.4043    1.4428   -0.0376 C   0  0  0  0  0  0  0  0  0  0  0  0
    2.4112    0.2292    0.0274 O   0  0  0  0  0  0  0  0  0  0  0  0
    3.5656    2.1185   -0.1469 O   0  0  0  0  0  0  0  0  0  0  0  0
    4.7854    1.3316   -0.1811 C   0  0  0  0  0  0  0  0  0  0  0  0
  1  2  1  0      
  3  4  1  0      
  4  5  1  0      
  5  2  1  0      
  6  7  1  0      
  7  8  1  0      
  3  9  1  0      
  6  1  2  0      
  9 10  2  0      
 10 11  1  0      
 11 12  1  0      
 12 13  1  0      
 13 14  2  0      
  8 14  1  0      
 13 15  1  0      
  9 16  1  0      
  5 17  1  0      
 17 19  1  0      
 18 19  1  0      
 17 20  2  0      
 19 21  2  0      
  4 18  1  0      
  6 22  1  0      
 22 23  2  0      
 22 24  1  0      
 24 25  1  0      
M  STY  1   1 SUP
M  SLB  1   1   1
M  SAL   1  4  22  23  24  25
M  SBL   1  1  23
M  SMT   1 COOMe
M  SBV   1 23   -7.7858    5.5142
M  END
$$$$
