# Supplementary material for: Cytotoxic and Antibacterial Cembranoids from a South China Sea Soft Coral, Lobophytum sp
Source: MDPI journal article supplement (doi:10.3390/md11041162), 2013-04-03
Supplement: s11 [file s11]

marinedrugs-11-01162-s005.mol
  ChemDraw04151417032D

 25 26  0  0  0  0  0  0  0  0999 V2000
   -0.0627    1.0342    0.0000 C   0  0  0  0  0  0  0  0  0  0  0  0
    0.7623    1.0342    0.0000 C   0  0  0  0  0  0  0  0  0  0  0  0
   -0.0627   -0.3948    0.0000 C   0  0  0  0  0  0  0  0  0  0  0  0
    0.7623   -0.3948    0.0000 C   0  0  0  0  0  0  0  0  0  0  0  0
    1.1748    0.3197    0.0000 C   0  0  0  0  0  0  0  0  0  0  0  0
   -0.5989    1.5704    0.0000 C   0  0  0  0  0  0  0  0  0  0  0  0
   -1.3605    1.2050    0.0000 C   0  0  0  0  0  0  0  0  0  0  0  0
   -2.1453    1.6323    0.0000 C   0  0  0  0  0  0  0  0  0  0  0  0
   -0.7771   -0.8073    0.0000 C   0  0  0  0  0  0  0  0  0  0  0  0
   -1.4916   -0.3948    0.0000 C   0  0  0  0  0  0  0  0  0  0  0  0
   -2.2056   -0.8073    0.0000 C   0  0  0  0  0  0  0  0  0  0  0  0
   -2.9201   -0.3948    0.0000 C   0  0  0  0  0  0  0  0  0  0  0  0
   -2.5076    0.3197    0.0000 C   0  0  0  0  0  0  0  0  0  0  0  0
   -2.9201    1.0342    0.0000 C   0  0  0  0  0  0  0  0  0  0  0  0
   -1.6826    0.3197    0.0000 C   0  0  0  0  0  0  0  0  0  0  0  0
   -0.7771   -1.6323    0.0000 C   0  0  0  0  0  0  0  0  0  0  0  0
    1.9993    0.3197    0.0000 C   0  0  0  0  0  0  0  0  0  0  0  0
    1.3457   -0.9781    0.0000 O   0  0  0  0  0  0  0  0  0  0  0  0
    2.2056   -0.5540    0.0000 C   0  0  0  0  0  0  0  0  0  0  0  0
    2.7138    0.7322    0.0000 C   0  0  0  0  0  0  0  0  0  0  0  0
    2.9201   -0.9665    0.0000 O   0  0  0  0  0  0  0  0  0  0  0  0
   -0.9132    0.8149    0.0000 C   0  0  0  0  0  0  0  0  0  0  0  0
   -1.7382    0.8149    0.0000 O   0  0  0  0  0  0  0  0  0  0  0  0
   -0.5007    0.1005    0.0000 O   0  0  0  0  0  0  0  0  0  0  0  0
    0.3243    0.1005    0.0000 C   0  0  0  0  0  0  0  0  0  0  0  0
  1  2  1  0      
  3  4  1  0      
  4  5  1  0      
  5  2  1  0      
  6  7  1  0      
  7  8  1  0      
  3  9  1  0      
  6  1  2  0      
  9 10  2  0      
 10 11  1  0      
 11 12  1  0      
 12 13  1  0      
 13 14  2  0      
  8 14  1  0      
 13 15  1  0      
  9 16  1  0      
  5 17  1  6      
 17 19  1  0      
 18 19  1  0      
 17 20  2  0      
 19 21  2  0      
  4 18  1  1      
  6 22  1  0      
 22 23  2  0      
 22 24  1  0      
 24 25  1  0      
M  STY  1   1 SUP
M  SLB  1   1   1
M  SAL   1  4  22  23  24  25
M  SBL   1  1  23
M  SMT   1 COOMe
M  SBV   1 23   -7.7858    5.5142
M  END
