# Supplementary material for: Cytotoxic and Antibacterial Cembranoids from a South China Sea Soft Coral, Lobophytum sp
Source: MDPI journal article supplement (doi:10.3390/md11041162), 2013-04-03
Supplement: s12 [file s12]

marinedrugs-11-01162-s006.mol
  ChemDraw03101420582D

 23 25  0  0  0  0  0  0  0  0999 V2000
   -0.0627    0.6526    0.0000 C   0  0  0  0  0  0  0  0  0  0  0  0
    0.7623    0.6526    0.0000 C   0  0  0  0  0  0  0  0  0  0  0  0
   -0.0627   -0.7763    0.0000 C   0  0  0  0  0  0  0  0  0  0  0  0
    0.7623   -0.7763    0.0000 C   0  0  0  0  0  0  0  0  0  0  0  0
    1.1748   -0.0619    0.0000 C   0  0  0  0  0  0  0  0  0  0  0  0
   -0.5989    1.1888    0.0000 C   0  0  0  0  0  0  0  0  0  0  0  0
   -1.3605    0.8235    0.0000 C   0  0  0  0  0  0  0  0  0  0  0  0
   -2.1458    1.2507    0.0000 C   0  0  0  0  0  0  0  0  0  0  0  0
   -0.7771   -1.1888    0.0000 C   0  0  0  0  0  0  0  0  0  0  0  0
   -1.4916   -0.7763    0.0000 C   0  0  0  0  0  0  0  0  0  0  0  0
   -2.2061   -1.1888    0.0000 C   0  0  0  0  0  0  0  0  0  0  0  0
   -2.9206   -0.7763    0.0000 C   0  0  0  0  0  0  0  0  0  0  0  0
   -2.5081   -0.0619    0.0000 C   0  0  0  0  0  0  0  0  0  0  0  0
   -2.9206    0.6526    0.0000 C   0  0  0  0  0  0  0  0  0  0  0  0
   -1.6831   -0.0619    0.0000 C   0  0  0  0  0  0  0  0  0  0  0  0
   -0.7771   -2.0138    0.0000 C   0  0  0  0  0  0  0  0  0  0  0  0
    1.9998   -0.0619    0.0000 C   0  0  0  0  0  0  0  0  0  0  0  0
    1.3457   -1.3597    0.0000 O   0  0  0  0  0  0  0  0  0  0  0  0
    2.2061   -0.9355    0.0000 C   0  0  0  0  0  0  0  0  0  0  0  0
    2.5832    0.5215    0.0000 C   0  0  0  0  0  0  0  0  0  0  0  0
    2.9206   -1.3480    0.0000 O   0  0  0  0  0  0  0  0  0  0  0  0
   -0.5989    2.0138    0.0000 C   0  0  0  0  0  0  0  0  0  0  0  0
   -0.7771   -0.3638    0.0000 O   0  0  0  0  0  0  0  0  0  0  0  0
  1  2  1  0      
  3  4  1  0      
  4  5  1  0      
  5  2  1  0      
  6  7  1  0      
  7  8  1  0      
  3  9  1  0      
  6  1  2  0      
  9 10  1  0      
 10 11  1  0      
 11 12  1  0      
 12 13  1  0      
 13 14  2  0      
  8 14  1  0      
 13 15  1  0      
  9 16  1  0      
  5 17  1  6      
 17 19  1  0      
 18 19  1  0      
 17 20  2  0      
 19 21  2  0      
  4 18  1  1      
  6 22  1  0      
 10 23  1  6      
  9 23  1  6      
M  END
