# Supplementary material for: Cytotoxic and Antibacterial Cembranoids from a South China Sea Soft Coral, Lobophytum sp
Source: MDPI journal article supplement (doi:10.3390/md11041162), 2013-04-03
Supplement: s14 [file s14]

marinedrugs-11-01162-s007.mol
  corina  04151405053D 1   1.00000     0.00000 
CORINA 3.49 0023  12.04.2013
 22 23  0  0  0  0  0  0  0  0999 V2000
   -0.0183    1.4970    0.0103 C   0  0  0  0  0  0  0  0  0  0  0  0
    0.0021   -0.0041    0.0020 C   0  0  0  0  0  0  0  0  0  0  0  0
    1.7195   -1.9564    0.7770 C   0  0  0  0  0  0  0  0  0  0  0  0
    1.9667   -1.4786   -0.6479 C   0  0  0  0  0  0  0  0  0  0  0  0
    0.8361   -0.5642   -1.1601 C   0  0  0  0  0  0  0  0  0  0  0  0
    0.9811    2.3276    0.0052 C   0  0  0  0  0  0  0  0  0  0  0  0
    0.7424    3.8076    0.1197 C   0  0  0  0  0  0  0  0  0  0  0  0
    1.2123    4.3077    1.5086 C   0  0  0  0  0  0  0  0  0  0  0  0
    2.5916   -1.1868    1.8035 C   0  0  0  0  0  0  0  0  0  0  0  0
    2.0347   -0.2615    2.5868 C   0  0  0  0  0  0  0  0  0  0  0  0
    2.8328    0.5138    3.5532 C   0  0  0  0  0  0  0  0  0  0  0  0
    2.0267    1.6949    4.1579 C   0  0  0  0  0  0  0  0  0  0  0  0
    2.2021    2.8740    3.3092 C   0  0  0  0  0  0  0  0  0  0  0  0
    1.1997    3.1338    2.4839 C   0  0  0  0  0  0  0  0  0  0  0  0
    3.3825    3.7432    3.3493 C   0  0  0  0  0  0  0  0  0  0  0  0
    3.9940   -1.5148    1.8907 C   0  0  0  0  0  0  0  0  0  0  0  0
   -0.0133   -1.5369   -1.9695 C   0  0  0  0  0  0  0  0  0  0  0  0
    1.9468   -2.6925   -1.5022 O   0  0  0  0  0  0  0  0  0  0  0  0
    0.7655   -2.7330   -2.1674 C   0  0  0  0  0  0  0  0  0  0  0  0
   -1.2434   -1.3249   -2.4313 C   0  0  0  0  0  0  0  0  0  0  0  0
    0.4046   -3.6703   -2.8531 O   0  0  0  0  0  0  0  0  0  0  0  0
    2.4436    1.9355   -0.1263 C   0  0  0  0  0  0  0  0  0  0  0  0
  1  2  1  0      
  3  4  1  0      
  4  5  1  0      
  5  2  1  0      
  6  7  1  0      
  7  8  1  0      
  3  9  1  0      
  6  1  2  0      
  9 10  2  0      
 10 11  1  0      
 11 12  1  0      
 12 13  1  0      
 13 14  2  0      
  8 14  1  0      
 13 15  1  0      
  9 16  1  0      
  5 17  1  0      
 17 19  1  0      
 18 19  1  0      
 17 20  2  0      
 19 21  2  0      
  6 22  1  0      
  4 18  1  0      
M  END
$$$$
